# Supplementary material for: Can Perceptuo-Motor Skills Assessment Outcomes in Young Table Tennis Players (7–11 years) Predict Future Competition Participation and Performance? An Observational Prospective Study
Source: PubMed Central journal article supplement (PMC4749309; doi:10.1371/journal.pone.0149037), 2016-02-10
Supplement: pone.0149037.s002.pdf [file pone.0149037.s002.pdf]

| Research ID | Year of testing | Competition yes / no | Competition periods (n) | Training experience (months) | Current training (hours/week) | Sex  | Test age (years) | Date of testing (dd.mm.yyyy) | Height (cm) | Weight (kg) | BMI (kg/m2) |
|-------------|-----------------|----------------------|-------------------------|------------------------------|-------------------------------|------|------------------|------------------------------|-------------|-------------|-------------|
| 1           | 2011            | 1                    | 5                       | 24                           | 3                             | boy  | 9                | 27.03.2011                   | 138         | 31,3        | 16,4        |
| 2           | 2011            | 1                    | 5                       | 36                           | 5,5                           | boy  | 10               | 27.03.2011                   | 150         | 36,3        | 16,1        |
| 3           | 2011            | 1                    | 5                       | 35                           | 2,5                           | girl | 10               | 27.03.2011                   | 145         | 40,5        | 19,3        |
| 4           | 2011            | 1                    | 5                       | 12                           | 1                             | boy  | 10               | 27.03.2011                   | 144         | 34,7        | 16,7        |
| 5           | 2011            | 1                    | 5                       | 2                            | 3                             | boy  | 9                | 27.03.2011                   | 145         | 37,5        | 17,8        |
| 6           | 2011            | 1                    | 5                       | 12                           | 2                             | boy  | 10               | 27.03.2011                   | 161         | 55,5        | 21,4        |
| 7           | 2011            | 1                    | 5                       | 24                           | 3                             | girl | 10               | 27.03.2011                   | 144         | 33,2        | 16          |
| 8           | 2011            | 1                    | 5                       | 6                            | 7                             | boy  | 9                | 27.03.2011                   | 144         | 34,3        | 16,5        |
| 9           | 2011            | 1                    | 5                       | 36                           | 6                             | girl | 9                | 27.03.2011                   | 151         | 37,1        | 16,3        |
| 10          | 2011            | 1                    | 1                       | 18                           | 2                             | boy  | 9                | 27.03.2011                   | 134         | 31,7        | 17,7        |
| 11          | 2011            | 1                    | 5                       | 6                            | 2                             | boy  | 10               | 27.03.2011                   | 151         | 39,3        | 17,2        |
| 12          | 2011            | 1                    | 5                       | 16                           | 1                             | girl | 9                | 27.03.2011                   | 148         | 39,9        | 18,2        |
| 13          | 2011            | 1                    | 1                       | 2                            | 3                             | boy  | 10               | 27.03.2011                   | 152         | 36,2        | 15,7        |
| 14          | 2011            | 1                    | 5                       | 12                           | 2,5                           | girl | 10               | 27.03.2011                   | 143         | 42,9        | 21          |
| 15          | 2011            | 1                    | 5                       | 22                           | 2,25                          | boy  | 10               | 27.03.2011                   | 141         | 31,7        | 15,9        |
| 16          | 2011            | 1                    | 4                       | 16                           | 1                             | girl | 10               | 27.03.2011                   | 151         | 48,2        | 21,1        |
| 17          | 2011            | 0                    | 0                       | 1                            | 2,25                          | boy  | 11               | 27.03.2011                   | 156         | 56,6        | 23,3        |
| 18          | 2011            | 0                    | 0                       | 6                            | 2,5                           | girl | 9                | 27.03.2011                   | 147         | 38,3        | 17,7        |
| 19          | 2011            | 0                    | 0                       | 6                            | 1                             | girl | 9                | 27.03.2011                   | 138         | 30,6        | 16,1        |
| 20          | 2011            | 1                    | 5                       | 12                           | 1                             | girl | 8                | 27.03.2011                   | 137         | 33,2        | 17,7        |
| 21          | 2011            | 0                    | 0                       | 2                            | 2,25                          | girl | 9                | 27.03.2011                   | 141         | 31,7        | 15,9        |
| 22          | 2011            | 1                    | 4                       | 2                            | 2,25                          | girl | 8                | 27.03.2011                   | 134         | 34,6        | 19,3        |
| 23          | 2011            | 1                    | 3                       | 4                            | 3                             | girl | 8                | 27.03.2011                   | 133         | 26,4        | 14,9        |
| 24          | 2011            | 1                    | 4                       | 12                           | 1                             | girl | 7                | 27.03.2011                   | 126         | 29,5        | 18,6        |
| 25          | 2011            | 1                    | 4                       | 2                            | 2,25                          | girl | 7                | 27.03.2011                   | 133         | 27,9        | 15,8        |
| 26          | 2012            | 1                    | 5                       | 9                            | 3                             | boy  | 10               | 23.06.2012                   | 155         | 45          | 18,7        |
| 27          | 2012            | 1                    | 5                       | 24                           | 3                             | boy  | 10               | 23.06.2012                   | 156         | 37,1        | 15,2        |
| 28          | 2012            | 1                    | 5                       | 12                           | 3                             | girl | 9                | 23.06.2012                   | 138         | 27,4        | 14,4        |
| 30          | 2012            | 1                    | 2                       | 6                            | 2,25                          | boy  | 11               | 23.06.2012                   | 155         | 43,4        | 18,1        |
| 31          | 2012            | 1                    | 5                       | 13                           | 3                             | girl | 11               | 23.06.2012                   | 158         | 49,6        | 19,9        |
| 33          | 2012            | 1                    | 5                       | 8                            | 3                             | boy  | 10               | 23.06.2012                   | 135         | 27          | 14,8        |
| 35          | 2012            | 1                    | 5                       | 8                            | 3                             | girl | 9                | 23.06.2012                   | 144         | 32,6        | 15,7        |
| 36          | 2012            | 1                    | 3                       | 7                            | 1                             | boy  | 10               | 23.06.2012                   | 147         | 38,1        | 17,6        |
| 39          | 2012            | 1                    | 2                       | 7                            | 1                             | boy  | 11               | 23.06.2012                   | 144         | 32,2        | 15,5        |
| 40          | 2012            | 1                    | 5                       | 7                            | 1                             | girl | 10               | 23.06.2012                   | 157         | 41,1        | 16,7        |
| 41          | 2012            | 1                    | 5                       | 7                            | 1                             | boy  | 9                | 23.06.2012                   | 145         | 34,2        | 16,3        |
| 42          | 2012            | 1                    | 5                       | 18                           | 3                             | girl | 11               | 23.06.2012                   | 140         | 41,7        | 21,3        |
| 43          | 2012            | 1                    | 5                       | 18                           | 3                             | boy  | 9                | 23.06.2012                   | 135         | 31,1        | 17,1        |
| 44          | 2012            | 1                    | 4                       | 12                           | 2                             | boy  | 9                | 23.06.2012                   | 132         | 24,5        | 14,1        |
| 45          | 2012            | 1                    | 1                       | 6                            | 3                             | boy  | 10               | 23.06.2012                   | 149         | 31,2        | 14,1        |
| 46          | 2012            | 1                    | 5                       | 12                           | 1,5                           | girl | 9                | 23.06.2012                   | 134         | 21,7        | 12,1        |
| 47          | 2012            | 0                    | 0                       | 3                            | 2                             | boy  | 10               | 23.06.2012                   | 153         | 32,8        | 14          |
| 48          | 2012            | 0                    | 0                       | 6                            | 3                             | girl | 9                | 23.06.2012                   | 133         | 30          | 17          |
| 49          | 2012            | 0                    | 0                       | 3                            | 1,5                           | girl | 8                | 23.06.2012                   | 129         | 26,4        | 15,9        |
| 50          | 2012            | 0                    | 0                       | 4                            | 1                             | girl | 9                | 23.06.2012                   | 145         | 36,9        | 17,6        |
| 51          | 2012            | 0                    | 0                       | 2                            | 1,5                           | boy  | 8                | 23.06.2012                   | 140         | 31,8        | 16,2        |
| 52          | 2012            | 1                    | 5                       | 18                           | 3                             | boy  | 7                | 23.06.2012                   | 130         | 25,7        | 15,2        |
| 53          | 2012            | 1                    | 1                       | 3                            | 1,5                           | girl | 8                | 23.06.2012                   | 131         | 29,6        | 17,3        |

1=yes

0=no

Can Perceptuo-motor Skills Assessment Outcomes in Young Table Tennis Players (7-11 years) predict Future Competition Participation and Performance?: An Observational Prospective Study – PLOS ONE

Irene R. Faber\*, Marije T. Elferink-Gemser, Niels R. Faber, Frits G.J. Oosterveld, Maria W.G. Nijhuis-Van der Sanden

\*Faculty of Physical Activity and Health, Saxion University of Applied Sciences, Enschede, The Netherlands. E-mail: i.r.faber@saxion.nl

| Research ID | Sprint (s) | Agility (s) | Vertical jump (cm) | Speed while dribbling (s) | Aiming at target (points) | Ball skills (points) | Throwing a ball (m) | Eye-hand coordination (catches) | Competitionscore |     |     |     |     |
|-------------|------------|-------------|--------------------|---------------------------|---------------------------|----------------------|---------------------|---------------------------------|------------------|-----|-----|-----|-----|
|             |            |             |                    |                           |                           |                      |                     |                                 | 1                | 2   | 3   | 4   | 5   |
| 1           | 31         | 22          | 24                 | 20                        | 40                        | 20                   | 11                  | 10                              | 164              | 168 | 202 | 202 | 274 |
| 2           | 32         | 24          | 26                 | 19                        | 20                        | 24                   | 11                  | 26                              | 93               | 138 | 168 | 220 | 238 |
| 3           | 31         | 24          | 30                 | 19                        | 32                        | 14                   | 9                   | 21                              | 109              | 135 | 145 | 148 | 144 |
| 4           | 29         | 22          | 27                 | 21                        | 28                        | 26                   | 11,5                | 19                              | 93               | 133 | 158 | 185 | 205 |
| 5           | 31         | 21          | 27                 | 26                        | 24                        | 31                   | 11                  | 22                              | 52               | 106 | 162 | 226 | 235 |
| 6           | 36         | 29          | 27                 | 20                        | 22                        | 26                   | 10                  | 10                              | 82               | 105 | 109 | 92  | 98  |
| 7           | 33         | 28          | 31                 | 22                        | 30                        | 16                   | 9,5                 | 18                              | 54               | 68  | 73  | 88  | 68  |
| 8           | 31         | 18          | 33                 | 21                        | 38                        | 16                   | 9,5                 | 21                              | 104              | 196 | 255 | 282 | 333 |
| 9           | 35         | 45          | 30                 | 20                        | 26                        | 17                   | 10,5                | 16                              | 48               | 78  | 116 | 158 | 119 |
| 10          | 32         | 21          | 24                 | 23                        | 16                        | 13                   | 9                   | 16                              | -28              |     |     |     |     |
| 11          | 34         | 23          | 29                 | 20                        | 36                        | 19                   | 9                   | 17                              | 70               | 76  | 109 | 146 | 185 |
| 12          | 33         | 24          | 28                 | 21                        | 26                        | 18                   | 8                   | 17                              | 35               | 68  | 95  | 120 | 148 |
| 13          | 32         | 22          | 27                 | 19                        | 28                        | 19                   | 11                  | 21                              | 48               |     |     |     |     |
| 14          | 35         | 21          | 35                 | 36                        | 20                        | 18                   | 9                   | 3                               | 20               | 36  | 48  | 73  | 105 |
| 15          | 34         | 26          | 17                 | 31                        | 10                        | 21                   | 7                   | 10                              | -28              | -40 | 52  | 38  | 63  |
| 16          | 37         | 29          | 28                 | 28                        | 18                        | 17                   | 8                   | 13                              |                  | 39  | 49  | 68  | 83  |
| 17          | 32         | 23          | 29                 | 31                        | 12                        | 29                   | 11                  | 18                              |                  |     |     |     |     |
| 18          | 33         | 25          | 28                 | 23                        | 18                        | 13                   | 9                   | 11                              |                  |     |     |     |     |
| 19          | 37         | 35          | 19                 | 23                        | 12                        | 12                   | 8                   | 6                               |                  |     |     |     |     |
| 20          | 36         | 25          | 28                 | 43                        | 14                        | 17                   | 9                   | 1                               | -12              | -14 | 35  | 11  |     |
| 21          | 31         | 21          | 28                 | 25                        | 24                        | 11                   | 9                   | 12                              |                  |     |     |     |     |
| 22          | 35         | 28          | 26                 | 29                        | 16                        | 13                   | 6,5                 | 1                               | 0                | 28  | 68  | 123 |     |
| 23          | 38         | 29          | 27                 | 33                        | 12                        | 22                   | 8,5                 | 8                               | -24              | -20 | -6  |     |     |
| 24          | 44         | 28          | 20                 | 39                        | 16                        | 10                   | 7                   | 3                               | -40              | -40 | -14 | 18  |     |
| 25          | 31         | 23          | 24                 | 32                        | 30                        | 17                   | 7                   | 7                               | -40              | -5  | 68  | 137 |     |
| 26          | 34         | 21          | 31                 | 15                        | 34                        | 25                   | 12                  | 25                              | 126              | 210 | 310 | 300 | 344 |
| 27          | 32         | 20          | 36,5               | 20                        | 32                        | 30                   | 11,5                | 21                              | 90               | 100 | 190 | 172 | 198 |
| 28          | 39         | 24          | 39                 | 20                        | 30                        | 25                   | 8,5                 | 19                              | 99               | 135 | 155 | 197 | 212 |
| 30          | 34         | 21          | 41,5               | 17                        | 6                         | 29                   | 10,5                | 20                              |                  |     |     | 35  | 50  |
| 31          | 39         | 31          | 35,5               | 20                        | 26                        | 26                   | 11                  | 15                              | 67               | 61  | 100 | 122 | 152 |
| 33          | 32         | 20          | 36                 | 17                        | 42                        | 24                   | 11                  | 17                              | 110              | 102 | 160 | 170 | 231 |
| 35          | 37         | 22          | 35,5               | 20                        | 8                         | 23                   | 8,5                 | 20                              | 52               | 75  | 105 | 132 | 135 |
| 36          | 41         | 24          | 32                 | 26                        | 14                        | 18                   | 10,5                | 9                               | -14              | 18  | 23  |     |     |
| 39          | 34         | 21          | 33                 | 18                        | 20                        | 22                   | 11                  | 3                               | -26              | 18  |     |     |     |
| 40          | 40         | 24          | 42,5               | 33                        | 20                        | 13                   | 8,5                 | 13                              | -38              | 12  | 8   | -19 | 10  |
| 41          | 35         | 27          | 28,5               | 23                        | 10                        | 22                   | 9                   | 4                               | -46              | 16  | 0   | 1   | 18  |
| 42          | 38         | 30          | 32                 | 22                        | 4                         | 10                   | 8                   | 14                              | -60              | 14  | 108 | 22  | 24  |
| 43          | 34         | 24          | 33                 | 27                        | 28                        | 18                   | 9,5                 | 1                               | -54              | 1   | -40 | 24  | 76  |
| 44          | 35         | 25          | 38                 | 17                        | 38                        | 26                   | 10,5                | 18                              |                  | 43  | 79  | 110 | 99  |
| 45          | 29         | 20          | 44                 | 21                        | 24                        | 17                   | 10                  | 15                              |                  |     | 200 |     |     |
| 46          | 36         | 25          | 35,5               | 25                        | 34                        | 15                   | 9,5                 | 17                              | 10               | 69  | 160 | 206 | 283 |
| 47          | 37         | 26          | 29,5               | 22                        | 8                         | 22                   | 9                   | 12                              |                  |     |     |     |     |
| 48          | 35         | 28          | 35                 | 20                        | 26                        | 10                   | 8,5                 | 10                              |                  |     |     |     |     |
| 49          | 37         | 27          | 33,5               | 37                        | 23                        | 5                    | 7                   | 2                               |                  |     |     |     |     |
| 50          | 37         | 29          | 28                 | 22                        | 26                        | 25                   | 8                   | 13                              |                  |     |     |     |     |
| 51          | 33         | 28          | 30                 | 24                        | 18                        | 23                   | 10                  | 11                              |                  |     |     |     |     |
| 52          | 44         | 29          | 31                 | 33                        | 4                         | 9                    | 7                   | 0                               | -80              | -10 | 20  | 18  | 54  |
| 53          | 37         | 26          | 24,5               | 25                        | 16                        | 5                    | 7                   | 3                               |                  |     |     |     | -13 |
